# Supplementary material for: Maternal mental health before and during the COVID-19 pandemic in the 2019 Rio Grande birth cohort
Source: PubMed Central journal article supplement — Braz J Psychiatry. 2021 Feb 15;43(4):402–6. doi: 10.1590/1516-4446-2020-1673 (PMC8352723; doi:10.1590/1516-4446-2020-1673), 2021-02-15
Supplement: bjp-43-04-402-s001.pdf [file bjp-43-04-402-s001.pdf]

**HEALTH AND WELLNESS RESEARCH QUESTIONNAIRE DURING THE CORONAVIRUS PANDEMIC (COVID-19)****English version:**

The State of Rio Grande do Sul recommends that all people stay home during the COVID-19 pandemic. We want to know how this is affecting you.

1. *How many people live with you right now (include you and your baby in the answer)?*
2. *In the last week (7 days), did you or someone who lives with you have to leave the house to go to work?*
  - a. Yes
  - b. No
3. *Do any of the people who live with you manage to work from home (paid work)?*
  - a. Yes
  - b. No
  - c. Nobody has a paid job
4. *Since the social isolation measures started, your family income has...*
  - a. Increased
  - b. Decreased
  - c. Stayed the same
5. *When you need something from outside the home, such as food or medicine, who gets it? (you can check more than one option)*
  - a. You
  - b. Someone else who lives with you
  - c. Someone else who doesn't live with you
  - d. I order out

6. *Now, we would like to know if you or your baby have left home during the past week (7 days).*

|           | No day | 1 day | 2 days | 3 days | 4 days | 5 days | 6 days | Every day |
|-----------|--------|-------|--------|--------|--------|--------|--------|-----------|
| You       |        |       |        |        |        |        |        |           |
| Your baby |        |       |        |        |        |        |        |           |

7. *Thinking about the days when you or your baby went out, how many hours more or less did you stay out?*

|           | Less than 1h | 1-3h | 3-6h | 6-8h | More than 8h |
|-----------|--------------|------|------|------|--------------|
| You       |              |      |      |      |              |
| Your baby |              |      |      |      |              |

8. *Do you use any kind of protection when you leave the house? If so, which ones? (you can check more than one option)*
  - a. Face mask
  - b. Hand sanitizer
  - c. Goggles
  - d. Gloves
  - e. No protection

9. Have you or your baby have had symptoms in the last week (7 days)?

|                      | You | Your baby | None |
|----------------------|-----|-----------|------|
| Fever                |     |           |      |
| Cough                |     |           |      |
| Difficulty breathing |     |           |      |
| Runny nose           |     |           |      |
| Sore throat          |     |           |      |

10. Have you or your baby needed or sought any of the following services in the past week (7 days)?

|                                                   | You | Your baby | None |
|---------------------------------------------------|-----|-----------|------|
| Medical care                                      |     |           |      |
| Psychological or psychiatric care                 |     |           |      |
| Coronavirus testing                               |     |           |      |
| Unified Health System services (clinic, hospital) |     |           |      |
| Private health care services                      |     |           |      |

11. Were you or your baby able to get any of the services you needed or sought in the past week (7 days)?

|                                                   | You | Your baby | None |
|---------------------------------------------------|-----|-----------|------|
| Medical care                                      |     |           |      |
| Psychological or psychiatric care                 |     |           |      |
| Coronavirus testing                               |     |           |      |
| Unified Health System services (clinic, hospital) |     |           |      |
| Private health care services                      |     |           |      |

12. Have any of the people who live with you ever been in direct contact with a person infected with the coronavirus? (you can check more than one option)

- a. You
- b. Your baby
- c. Another person
- d. None

---

### IMPACT OF EVENT SCALE (IES)

Here are some difficulties that people can go through when they experience stressful times. Answer below how you have felt about COVID-19 since last week (7 days). Check the level of stress most similar to what you are going through. Check only ONE option for each of the statements below.

|                                                                                                                     | Not at all | Rarely | Sometimes | Often |
|---------------------------------------------------------------------------------------------------------------------|------------|--------|-----------|-------|
| 13. I thought about it when I didn't mean to                                                                        |            |        |           |       |
| 14. I avoided letting myself get upset when I thought about it or was reminded of it                                |            |        |           |       |
| 15. I tried to remove it from memory                                                                                |            |        |           |       |
| 16. I had trouble falling asleep or staying asleep, because of pictures or thoughts about it that came into my mind |            |        |           |       |
| 17. I had waves of strong feelings about it                                                                         |            |        |           |       |
| 18. I had dreams about it                                                                                           |            |        |           |       |

|                                                                                                 |  |  |  |  |
|-------------------------------------------------------------------------------------------------|--|--|--|--|
| 19. <i>I stayed away from reminders of it</i>                                                   |  |  |  |  |
| 20. <i>I felt as if it hadn't happened or it wasn't real</i>                                    |  |  |  |  |
| 21. <i>I tried not to talk about it</i>                                                         |  |  |  |  |
| 22. <i>Pictures about it popped into my mind</i>                                                |  |  |  |  |
| 23. <i>Other things kept making me think about it</i>                                           |  |  |  |  |
| 24. <i>I was aware that I still had a lot of feelings about it, but I didn't deal with them</i> |  |  |  |  |
| 25. <i>I tried not to think about it</i>                                                        |  |  |  |  |
| 26. <i>Any reminder brought back feelings about it</i>                                          |  |  |  |  |
| 27. <i>My feelings about it were kind of numb</i>                                               |  |  |  |  |

---

### EDINBURGH POSTNATAL DEPRESSION SCALE (EPDS)

We would also like to know how you have been feeling since the last week (7 days). Check only ONE option for each of the statements below.

28. *I have laughed and been able to look on the bright side of life*

- a. Yes, as usual
- b. A little less now than before
- c. Definitely less than before
- d. No, not at all

29. *I have looked forward to the future*

- a. Yes, as usual
- b. A little less than usual
- c. A lot less than usual
- d. Not at all

30. *I have blamed myself unjustifiably when things have gone wrong*

- a. No, not at all
- b. Rarely
- c. Sometimes
- d. Yes, very often

31. *I have become anxious or worried for no good reason*

- a. Yes, very much so
- b. Yes, sometimes
- c. No, not often
- d. No, not at all

32. *I have felt frightened or panicky for no good reason*

- a. Yes, very much so
- b. Yes, sometimes
- c. No, not often
- d. No, not at all

<http://dx.doi.org/10.1590/1516-4446-2020-1673>

Maternal mental health before and during the COVID-19 pandemic in the 2019 Rio Grande birth cohort - Loret de Mola C et al.

33. *I have not been able to face up to problems*

- a. Yes, I have felt incapable of facing up to problems most of the time
- b. Yes, sometimes I have not faced up to my problems as I usually would
- c. No, in the majority of cases I have been able to face up to problems
- d. relatively well
- e. No, I have been able to face up to problems as I always have

34. *I have felt so bad that I have had difficulty in sleeping*

- a. Yes, most of the time
- b. Yes, sometimes
- c. No, not often
- d. No, not at all

35. *I have felt sad or unwell*

- a. Yes, most of the time
- b. Yes, often
- c. Not often
- d. Not at all

36. *I have felt so sad that I have cried*

- a. Yes, most of the time
- b. Yes, often
- c. Once in a while
- d. Never

37. *I have thought about injuring myself*

- a. Yes, often
- b. Sometimes
- c. Rarely
- e. Never

---

## GENERALIZED ANXIETY DISORDER (GAD-7) SCALE

How often have you been troubled by the problems below? Respond thinking about the last 2 weeks (13 days). Check only ONE option for each of the statements below.

|                                                              | Not at all sure | Several days | Over half the days | Nearly every day |
|--------------------------------------------------------------|-----------------|--------------|--------------------|------------------|
| 38. <i>Feeling nervous, anxious, or on edge</i>              |                 |              |                    |                  |
| 39. <i>Not being able to stop or control worrying</i>        |                 |              |                    |                  |
| 40. <i>Worrying too much about different things</i>          |                 |              |                    |                  |
| 41. <i>Trouble relaxing</i>                                  |                 |              |                    |                  |
| 42. <i>Being so restless that it's hard to sit still</i>     |                 |              |                    |                  |
| 43. <i>Becoming easily annoyed or irritable</i>              |                 |              |                    |                  |
| 44. <i>Feeling afraid as if something awful might happen</i> |                 |              |                    |                  |

---

We're almost done!

What are your concerns about your baby born in 2019? When answering, think about the past 7 days and the COVID-19 pandemic. Check only ONE option for each of the statements below.

|                                                                                                                                                      | Yes | No | None |
|------------------------------------------------------------------------------------------------------------------------------------------------------|-----|----|------|
| 45. <i>I have been worried about not having enough food, milk, or essential items for my baby</i>                                                    |     |    |      |
| 46. <i>I am afraid to leave home</i>                                                                                                                 |     |    |      |
| 47. <i>I have been worried that the baby will catch the coronavirus or get sick</i>                                                                  |     |    |      |
| 48. <i>I have been worried about catching the coronavirus or getting sick</i>                                                                        |     |    |      |
| 49. <i>I have been worried about someone else at home catching the coronavirus</i>                                                                   |     |    |      |
| 50. <i>I have been worried that I will give my baby the coronavirus</i>                                                                              |     |    |      |
| 51. <i>I have been worried about the effect of this pandemic on my baby's future</i>                                                                 |     |    |      |
| 52. <i>I have noticed that my baby is more restless when he performs usual activities such as eating, playing, sleeping, etc.</i>                    |     |    |      |
| 53. <i>I have become more irritated when my baby cries</i>                                                                                           |     |    |      |
| 54. <i>I have felt that my baby is more irritated</i>                                                                                                |     |    |      |
| 55. <i>I realize that the conflicts between my baby and me have increased</i>                                                                        |     |    |      |
| 56. <i>I have been able to maintain a routine with my baby similar to the one we had before the pandemic</i>                                         |     |    |      |
| 57. <i>My baby has a routine for what he does during the day</i>                                                                                     |     |    |      |
| 58. <i>I stopped breastfeeding my baby because of the pandemic</i>                                                                                   |     |    |      |
| 59. <i>I have been able to maintain a regular physical activity routine for myself during the day</i>                                                |     |    |      |
| 60. <i>I have been able to keep in touch with my friends or family outside the home through social media, WhatsApp, the telephone or video calls</i> |     |    |      |

**Portuguese version:**

O Rio Grande do Sul recomenda que todas as pessoas fiquem em casa durante a pandemia de COVID-19. Queremos saber de que maneira isso está lhe afetando.

1. *Hoje, quantas pessoas moram com você (inclua você e o seu bebê na resposta)?*
2. *Na última semana (7 dias), você ou alguém que mora com você teve que sair de casa para ir trabalhar?*
  - a. Sim
  - b. Não
3. *Alguma das pessoas que moram com você consegue trabalhar de casa (remunerado)?*
  - a. Sim
  - b. Não
  - c. Ninguém tem um trabalho remunerado
4. *Desde que começou as medidas de isolamento social, a sua renda familiar...*
  - a. Aumentou
  - b. Diminuiu
  - c. Se manteve igual
5. *Quando você precisa de algo de fora de casa, por exemplo, comida ou remédio, quem vai buscar? (pode marcar mais de uma opção)*
  - a. Você
  - b. Outra pessoa que mora com você
  - c. Outra pessoa que não mora com você
  - d. Pede tele-entrega

6. *Agora, gostaríamos de saber se você ou seu bebê saíram de casa durante a última semana (7 dias).*

|          | Nenhum dia | 1 dia | 2 dias | 3 dias | 4 dias | 5 dias | 6 dias | Todos os dias |
|----------|------------|-------|--------|--------|--------|--------|--------|---------------|
| Você     |            |       |        |        |        |        |        |               |
| Seu bebê |            |       |        |        |        |        |        |               |

7. *Pensando nos dias em que você ou o seu bebê saíram, quantas horas mais ou menos ficaram fora de casa?*

|          | Menos de 1h | 1-3h | 3-6h | 6-8h | Mais de 8h |
|----------|-------------|------|------|------|------------|
| Você     |             |      |      |      |            |
| Seu bebê |             |      |      |      |            |

8. *Você usa algum tipo de proteção quando sai de casa? Se sim, quais? (Pode marcar mais de uma opção)*
  - a. Máscara facial
  - b. Álcool em gel
  - c. Óculos de proteção
  - d. Luvas
  - e. Não usa nenhuma proteção

9. *Você ou seu bebê tem ou tiveram esses sintomas na última semana (7 dias)?*

|                         | Você | Seu bebê | Ninguém |
|-------------------------|------|----------|---------|
| Febre                   |      |          |         |
| Tosse                   |      |          |         |
| Dificuldade de respirar |      |          |         |
| Coriza                  |      |          |         |
| Dor de garganta         |      |          |         |

10. *Você ou o seu bebê precisou ou buscou algum dos seguintes serviços na última semana (7 dias)?*

|                                                            | Você | Seu bebê | Ninguém |
|------------------------------------------------------------|------|----------|---------|
| Atendimento médico                                         |      |          |         |
| Atendimento psicológico ou psiquiátrico                    |      |          |         |
| Realizar exame para coronavírus                            |      |          |         |
| Utilizar serviços de saúde do sistema único de saúde – SUS |      |          |         |
| Utilizar serviços de saúde privado                         |      |          |         |

11. *Você ou o seu bebê, além de precisar ou buscar, conseguiu algum desses serviços na última semanas (7 dias)?*

|                                                            | Você | Seu bebê | Ninguém |
|------------------------------------------------------------|------|----------|---------|
| Atendimento médico                                         |      |          |         |
| Atendimento psicológico ou psiquiátrico                    |      |          |         |
| Realizar exame para coronavírus                            |      |          |         |
| Utilizar serviços de saúde do sistema único de saúde – SUS |      |          |         |
| Utilizar serviços de saúde privado                         |      |          |         |

12. *Dentre as pessoas que moram com você, alguém já esteve em contato direto com uma pessoa infectada por coronavírus? (pode marcar mais de uma opção)*

- a. Você
- b. Seu bebê
- c. Outra pessoa
- d. Ninguém

**ESCALA DE IMPACTO DO EVENTO (IES)**

Aqui estão algumas dificuldades que as pessoas podem passar quando vivem momentos estressantes. Responda abaixo como você se sente sobre o COVID-19, desde a última semana (7 dias). Assinale o nível de estresse mais parecido com o qual você está passando. Marque apenas UMA opção para cada uma das afirmações abaixo.

|                                                                    | Nunca | Raramente | Às vezes | Frequentemente |
|--------------------------------------------------------------------|-------|-----------|----------|----------------|
| 13. <i>Pensei sobre isso quando não tinha intenção</i>             |       |           |          |                |
| 14. <i>Evitei me deixar chatear quando pensei ou lembrei disso</i> |       |           |          |                |
| 15. <i>Tentei tirar isso da memória</i>                            |       |           |          |                |

|                                                                                                                                    |  |  |  |  |
|------------------------------------------------------------------------------------------------------------------------------------|--|--|--|--|
| 16. <i>Eu tive problemas para adormecer ou permanecer dormindo por causa das imagens ou pensamentos que surgiam em minha mente</i> |  |  |  |  |
| 17. <i>Tive ondas de fortes sentimentos sobre isso</i>                                                                             |  |  |  |  |
| 18. <i>Eu tive sonhos sobre isso</i>                                                                                               |  |  |  |  |
| 19. <i>Fiquei afastado do que me lembraria disso</i>                                                                               |  |  |  |  |
| 20. <i>Senti como se isso não tivesse acontecido ou não fosse real</i>                                                             |  |  |  |  |
| 21. <i>Tentei não falar sobre isso</i>                                                                                             |  |  |  |  |
| 22. <i>Imagens sobre isso invadem minha mente</i>                                                                                  |  |  |  |  |
| 23. <i>Outras coisas continuam me fazendo pensar sobre isso</i>                                                                    |  |  |  |  |
| 24. <i>Estava consciente de que eu ainda tinha muitos sentimentos sobre isso, mas eu não lidei com eles</i>                        |  |  |  |  |
| 25. <i>Tentei não pensar sobre isso</i>                                                                                            |  |  |  |  |
| 26. <i>Qualquer lembrete trazia de volta os sentimentos sobre isso</i>                                                             |  |  |  |  |
| 27. <i>Meus sentimentos sobre isso estavam meio anestesiados</i>                                                                   |  |  |  |  |

---

### ESCALA DE DEPRESSÃO PÓS-NATAL DE EDINBURGO (EPDS)

Também gostaríamos de saber como você está se sentindo desde a última semana (7 dias). Marque apenas UMA opção para cada uma das afirmações abaixo.

28. *Eu tenho sido capaz de rir e achar graça das coisas*

- Como eu sempre fiz
- Não tanto quanto antes
- Sem dúvida, menos que antes
- De jeito nenhum

29. *Eu tenho pensado no futuro com alegria*

- Sim, como de costume
- Um pouco menos que de costume
- Muito menos que de costume
- Praticamente não

30. *Eu tenho me culpado sem razão quando as coisas dão errado*

- Não, de jeito nenhum
- Raramente
- Sim, às vezes
- Sim, muito frequentemente



31. *Eu tenho ficado ansiosa ou preocupada sem uma boa razão*
- Sim, muito seguido
  - Sim, às vezes
  - De vez em quando
  - Não, de jeito nenhum
32. *Eu tenho me sentido assustada ou em pânico sem um bom motivo*
- Sim, muito seguido
  - Sim, às vezes
  - Raramente
  - Não, de jeito nenhum
33. *Eu tenho me sentido sobrecarregada pelas tarefas e acontecimentos do meu dia-a-dia*
- Sim. Na maioria das vezes eu não consigo lidar bem com eles
  - Sim. Algumas vezes não consigo lidar bem como antes
  - Não. Na maioria das vezes consigo lidar bem com eles
  - Não. Eu consigo lidar com eles tão bem quanto antes
34. *Eu tenho me sentido tão infeliz que eu tenho tido dificuldade de dormir*
- Sim, na maioria das vezes
  - Sim, algumas vezes
  - Raramente
  - Não, nenhuma vez
35. *Eu tenho me sentido triste ou muito mal*
- Sim, na maioria das vezes
  - Sim, muitas vezes
  - Raramente
  - Não, de jeito nenhum
36. *Eu tenho me sentido tão triste que tenho chorado*
- Sim, a maior parte do tempo
  - Sim, muitas vezes
  - Só de vez em quando
  - Não, nunca
37. *Eu tenho pensado em fazer alguma coisa contra mim mesma*
- Sim, muitas vezes
  - Às vezes
  - Raramente
  - Nunca
-

**ESCALA DE TRANSTORNO DE ANSIEDADE GENERALIZADA (GAD-7)**

Com que frequência você foi incomodada pelos problemas abaixo? Responda pensando nas últimas 2 semanas (13 dias). Marque apenas UMA opção para cada uma das afirmações abaixo.

|                                                                        | Nenhum a vez | Vários dias | Mais da metade dos dias | Quase todos os dias |
|------------------------------------------------------------------------|--------------|-------------|-------------------------|---------------------|
| 38. <i>Sentir-se nervosa, ansiosa ou muito tensa</i>                   |              |             |                         |                     |
| 39. <i>Não ser capaz de impedir ou de controlar as preocupações</i>    |              |             |                         |                     |
| 40. <i>Preocupar-se muito com diversas coisas</i>                      |              |             |                         |                     |
| 41. <i>Dificuldade para relaxar</i>                                    |              |             |                         |                     |
| 42. <i>Ficar tão agitado/a que se torna difícil permanecer sentada</i> |              |             |                         |                     |
| 43. <i>Ficar facilmente aborrecido/a ou irritado/a</i>                 |              |             |                         |                     |
| 44. <i>Sentir medo como se algo horrível fosse acontecer</i>           |              |             |                         |                     |

Estamos quase chegando ao fim!

Quais são suas preocupações em relação ao seu bebê nascido em 2019? Responda pensando nos últimos 7 dias e na pandemia do COVID-19. Marque apenas UMA opção para cada uma das afirmações abaixo.

|                                                                                                                                                      | Sim | Não | Não sei |
|------------------------------------------------------------------------------------------------------------------------------------------------------|-----|-----|---------|
| 45. <i>Tenho me preocupado de não ter comida suficiente, leite ou itens essenciais para meu bebê</i>                                                 |     |     |         |
| 46. <i>Tenho medo de sair de casa</i>                                                                                                                |     |     |         |
| 47. <i>Tenho me preocupado que o bebê pegue o coronavírus ou fique doente</i>                                                                        |     |     |         |
| 48. <i>Tenho me preocupado de eu pegar coronavírus ou ficar doente</i>                                                                               |     |     |         |
| 49. <i>Tenho me preocupado de alguém mais em casa pegar o coronavírus</i>                                                                            |     |     |         |
| 50. <i>Tenho me preocupado de eu passar o coronavírus para meu bebê</i>                                                                              |     |     |         |
| 51. <i>Tenho me preocupado do efeito desta pandemia no futuro do meu bebê</i>                                                                        |     |     |         |
| 52. <i>Tenho notado que meu bebê fica mais inquieto quando realiza atividades usuais como comer, brincar, dormir, etc</i>                            |     |     |         |
| 53. <i>Tenho ficado mais irritada quando meu bebê chora</i>                                                                                          |     |     |         |
| 54. <i>Tenho sentido que meu bebê está mais irritado</i>                                                                                             |     |     |         |
| 55. <i>Percebo que tem aumentado os conflitos entre meu bebê e eu</i>                                                                                |     |     |         |
| 56. <i>Tenho conseguido manter uma rotina igual ou similar a que tínhamos com meu bebê antes da pandemia</i>                                         |     |     |         |
| 57. <i>Meu bebê tem uma rotina regular para o que faz durante o dia</i>                                                                              |     |     |         |
| 58. <i>Deixei de amamentar meu bebê por causa da pandemia</i>                                                                                        |     |     |         |
| 59. <i>Tenho conseguido manter uma rotina de atividade física regular para mim durante o dia.</i>                                                    |     |     |         |
| 60. <i>Tenho conseguido manter contato com meus amigos ou familiares fora de casa através de mídias sociais, WhatsApp, telefone ou vídeo chamada</i> |     |     |         |

**Table S1.** Sample description and relative frequencies of baseline and WebCOVID-19 online follow-up variables, Rio Grande, state of Rio Grande do Sul, southern Brazil, 2019.

|                                               | Followed-up sample in<br>WebCovid-19 (n=1,142)<br>n (%) |         | Not included eligible for<br>WebCovid-19 (n=1,010)<br>n (%) |
|-----------------------------------------------|---------------------------------------------------------|---------|-------------------------------------------------------------|
| Age                                           |                                                         | p=0.220 |                                                             |
| < 20 years                                    | 116 (11.1)                                              |         | 140 (13.9)                                                  |
| 20-24 years                                   | 277 (26.6)                                              |         | 279 (27.6)                                                  |
| 25-34 years                                   | 476 (45.7)                                              |         | 434 (43.0)                                                  |
| ≥ 35 years                                    | 173 (16.6)                                              |         | 157 (15.5)                                                  |
| Skin color                                    |                                                         | p<0.001 |                                                             |
| White                                         | 845 (81.1)                                              |         | 731 (72.4)                                                  |
| Black                                         | 128 (12.3)                                              |         | 174 (17.2)                                                  |
| Brown                                         | 69 (6.6)                                                |         | 105 (10.4)                                                  |
| Schooling                                     |                                                         | p<0.001 |                                                             |
| Elementary school                             | 213 (20.4)                                              |         | 394 (39.0)                                                  |
| High school                                   | 507 (48.7)                                              |         | 471 (46.6)                                                  |
| College or more                               | 322 (30.9)                                              |         | 145 (14.4)                                                  |
| Income (tertiles)                             |                                                         | p<0.001 |                                                             |
| 1st (poorest)                                 | 285 (27.8)                                              |         | 431 (44.1)                                                  |
| 2nd                                           | 310 (30.2)                                              |         | 287 (29.3)                                                  |
| 3rd (richest)                                 | 430 (42.0)                                              |         | 260 (26.6)                                                  |
| Number of people in the household             |                                                         | p<0.001 |                                                             |
| < 3                                           | 699 (67.1)                                              |         | 563 (55.7)                                                  |
| 3 or 4                                        | 202 (19.4)                                              |         | 220 (21.8)                                                  |
| ≥ 5                                           | 141 (13.5)                                              |         | 227 (22.5)                                                  |
| EPDS at baseline                              |                                                         | p=0.220 |                                                             |
| Normal                                        | 975 (94.9)                                              |         | 931 (93.7)                                                  |
| Depression                                    | 52 (5.1)                                                |         | 63 (6.3)                                                    |
| GAD-7 at baseline                             | p=0.090                                                 |         |                                                             |
| Normal/light                                  | 940 (90.4)                                              |         | 886 (88.1)                                                  |
| Moderate/severe                               | 100 (9.6)                                               |         | 120 (11.9)                                                  |
| Child's sex                                   |                                                         | p=0.710 |                                                             |
| Male                                          | 527 (50.6)                                              |         | 519 (51.4)                                                  |
| Female                                        | 515 (49.4)                                              |         | 491 (48.6)                                                  |
| Change in income during COVID-19              |                                                         | p=0.710 |                                                             |
| Increase                                      | *                                                       |         | 36 (3.5)                                                    |
| Decrease                                      | *                                                       |         | 596 (57.2)                                                  |
| Stable                                        | *                                                       |         | 410 (39.3)                                                  |
| Anyone goes out for work in the household     |                                                         | p=0.710 |                                                             |
| Yes                                           | *                                                       |         | 831 (79.8)                                                  |
| No                                            | *                                                       |         | 211 (20.2)                                                  |
| Sought for psychological/psychiatric services |                                                         | p=0.710 |                                                             |
| No                                            | *                                                       |         | 1,003 (96.3)                                                |
| Yes                                           | *                                                       |         | 39 (3.7)                                                    |
| Child's age (tertile)                         |                                                         | p=0.710 |                                                             |
| 1st (youngest)                                | †                                                       |         | 347 (33.4)                                                  |
| 2nd                                           | †                                                       |         | 347 (33.4)                                                  |
| 3rd (oldest)                                  | †                                                       |         | 346 (33.3)                                                  |

COVID-19 = coronavirus disease 2019; EPDS = Edinburgh Postnatal Depression Scale; GAD-7 = Generalized Anxiety Disorder 7-item.

\* Information not collected.

† All children were the same age (followed-up at birth).
